# Supplementary material
Source: publisher site journal article supplement (https://www.dovepress.com/article/394843)
Supplement: Supplementary file 1 [file get_supplementary_file.php]

## SUPPLEMENT

**Supplementary Table 1. Distribution of patients per country, sex, and age**

| Characteristic                | Patients (n) |
|-------------------------------|--------------|
| <b>Sex</b>                    |              |
| Female                        | 9            |
| Male                          | 21           |
| <b>Age in years</b>           |              |
| 20-39                         | 6            |
| 40-59                         | 9            |
| 60-79                         | 10           |
| 80-89                         | 5            |
| <b>Exposure time in weeks</b> |              |
| <12                           | 6            |
| 12-26                         | 4            |
| 26-52                         | 6            |
| 52-104                        | 12           |
| >104                          | 2            |
| <b>Country</b>                |              |
| Australia                     | 1            |
| Germany                       | 3            |
| France                        | 10           |
| Ireland                       | 3            |
| The Netherlands               | 10           |
| Switzerland                   | 1            |
| United Kingdom                | 2            |

**Supplementary Table 2. All Adverse Events during the Early Access Program**

| System Organ Class (SOC)                             | Reported SAEs in preferred terms        | Reported AEs in preferred terms    |
|------------------------------------------------------|-----------------------------------------|------------------------------------|
| Blood and lymphatic system disorders                 | <i>Lymphopenia</i>                      | -                                  |
| Eye disorders                                        | <i>Age-related macular degeneration</i> | -                                  |
|                                                      | <i>Metamorphopsia</i>                   |                                    |
|                                                      | <i>Retinal oedema</i>                   |                                    |
|                                                      | <i>Visual acuity reduced</i>            |                                    |
| General disorders and administration site conditions | -                                       | <i>Drug ineffective</i>            |
|                                                      |                                         | <i>Malaise</i>                     |
| Infections and infestations                          | <i>COVID-19</i>                         | -                                  |
|                                                      | <i>Klebsiella infection</i>             |                                    |
|                                                      | <i>Staphylococcal bacteraemia</i>       |                                    |
|                                                      | <i>Urosepsis</i>                        |                                    |
| Injury, poisoning and procedural complications       | -                                       | <i>Product dose omission issue</i> |
|                                                      |                                         | <i>Therapy interrupted</i>         |
| Musculoskeletal and connective tissue disorders      | -                                       | <i>Muscle disorder</i>             |
| Nervous system disorders                             | -                                       | <i>Dysgeusia</i>                   |
| Renal and urinary disorders                          | <i>Acute kidney injury</i>              | -                                  |
|                                                      | <i>End stage renal disease</i>          |                                    |
|                                                      | <i>Renal failure</i>                    |                                    |

|                                          |                            |                          |
|------------------------------------------|----------------------------|--------------------------|
|                                          | <i>Renal impairment</i>    |                          |
| Reproductive system and breast disorders | <i>Prostatitis</i>         |                          |
| Skin and subcutaneous tissue disorders   |                            | <i>Rash erythematous</i> |
| Surgical and medical procedures          | <i>Therapy interrupted</i> |                          |
| Vascular disorders                       | <i>Haemorrhage</i>         | <i>Flushing</i>          |
| <i>Total</i>                             | <i>15</i>                  | <i>9</i>                 |
